# Supplementary material for: GloCAB: Global Cropland Burned Area from Mid-2002 to 2020
Source: Copernicus journal article supplement (doi:10.5194/essd-2023-191), 2023-06-14
Supplement: Supplementary file 1 [file essd-2023-191-supplement.pdf]

*ESSD*

Supporting Information for

**GloCAB: Global Cropland Burned Area From Mid-2002 To 2020**

J.V. Hall<sup>1</sup>, F. Argueta<sup>1</sup>, M. Zubkova<sup>1</sup>, Y. Chen<sup>2</sup>, J.T. Randerson<sup>2</sup>, L. Giglio<sup>1</sup>

<sup>1</sup>University of Maryland, Department of Geographical Sciences, College Park, MD, USA

<sup>2</sup>Department of Earth System Science, University of California, Irvine, CA, USA

**Contents of this file**

Figures S1 to S2

Tables S1

**Table S1:** Estimated lower-limit ( $\alpha_L$ -based) and upper-limit ( $\alpha_H$ -based) annual total global burned area (units: Mha) compared to the MCD64A1 Collection 6 burned area product.

| Year                     | Estimated annual global burned area (Mha) |             | MCD64A1 collection 6 burned area (Mha) |
|--------------------------|-------------------------------------------|-------------|----------------------------------------|
|                          | Lower Limit                               | Upper Limit |                                        |
| 2003                     | 90                                        | 134         | 33                                     |
| 2004                     | 94                                        | 138         | 36                                     |
| 2005                     | 97                                        | 140         | 40                                     |
| 2006                     | 88                                        | 128         | 36                                     |
| 2007                     | 90                                        | 130         | 35                                     |
| 2008                     | 102                                       | 149         | 38                                     |
| 2009                     | 88                                        | 126         | 33                                     |
| 2010                     | 79                                        | 115         | 31                                     |
| 2011                     | 77                                        | 109         | 30                                     |
| 2012                     | 73                                        | 104         | 29                                     |
| 2013                     | 65                                        | 91          | 25                                     |
| 2014                     | 81                                        | 116         | 30                                     |
| 2015                     | 78                                        | 111         | 30                                     |
| 2016                     | 71                                        | 101         | 28                                     |
| 2017                     | 79                                        | 113         | 30                                     |
| 2018                     | 64                                        | 91          | 22                                     |
| 2019                     | 70                                        | 99          | 26                                     |
| 2020                     | 70                                        | 101         | 26                                     |
| <b>2003-2020 Average</b> | <b>81</b>                                 | <b>116</b>  | <b>32</b>                              |

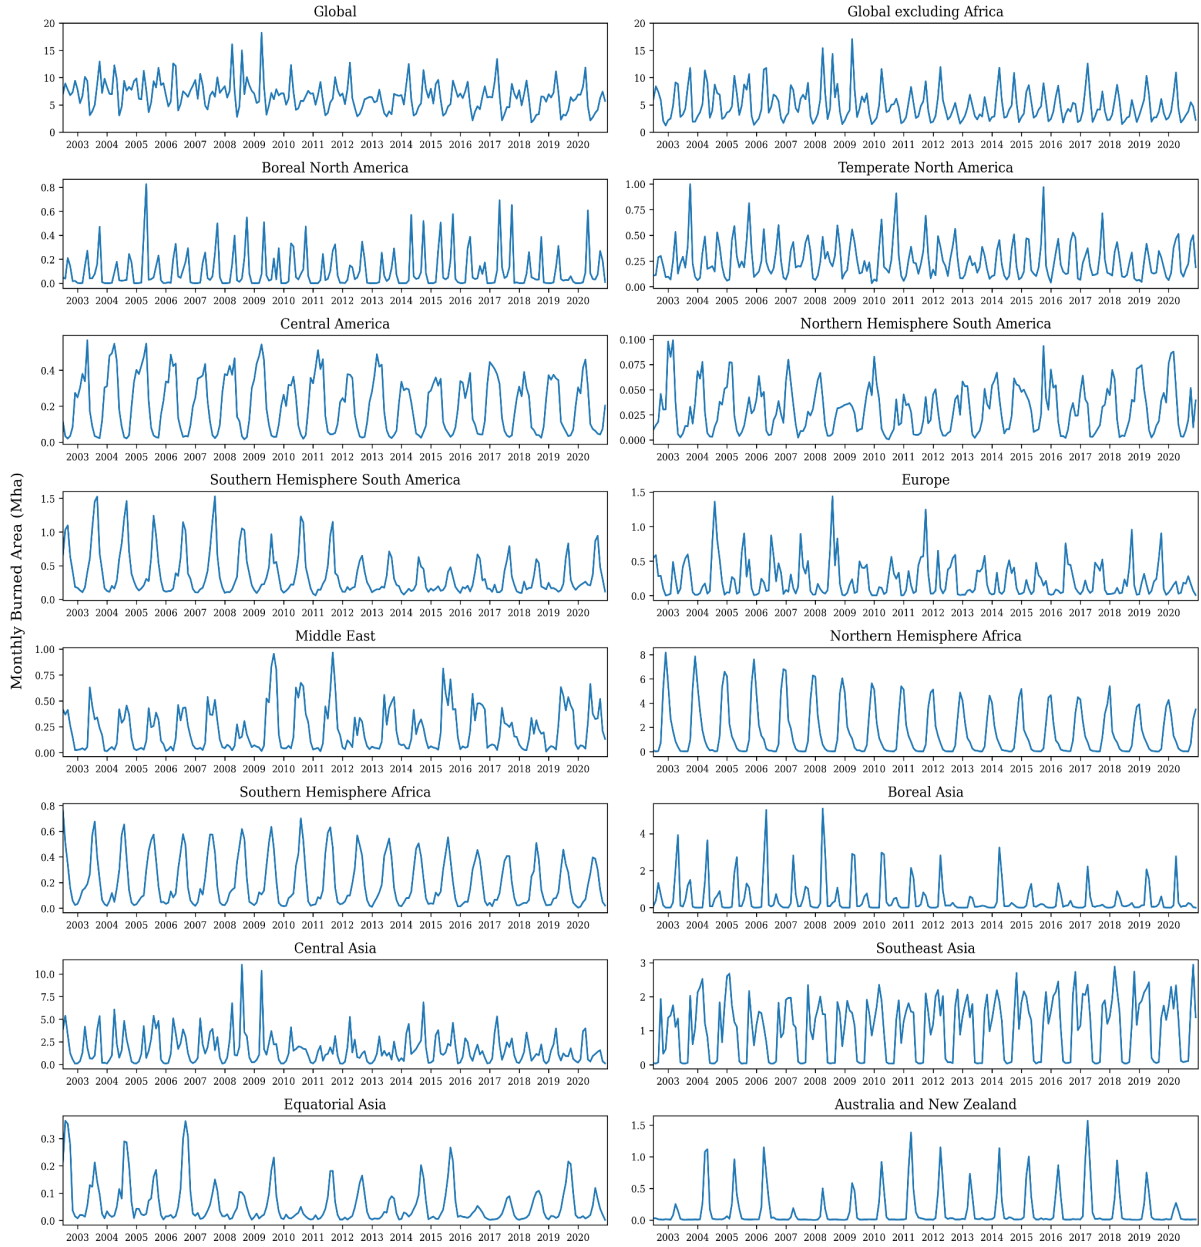

**Figure S1:** Global and GFED regional monthly cropland burned area time series (July 2002 – December 2020) for the lower alpha estimates.

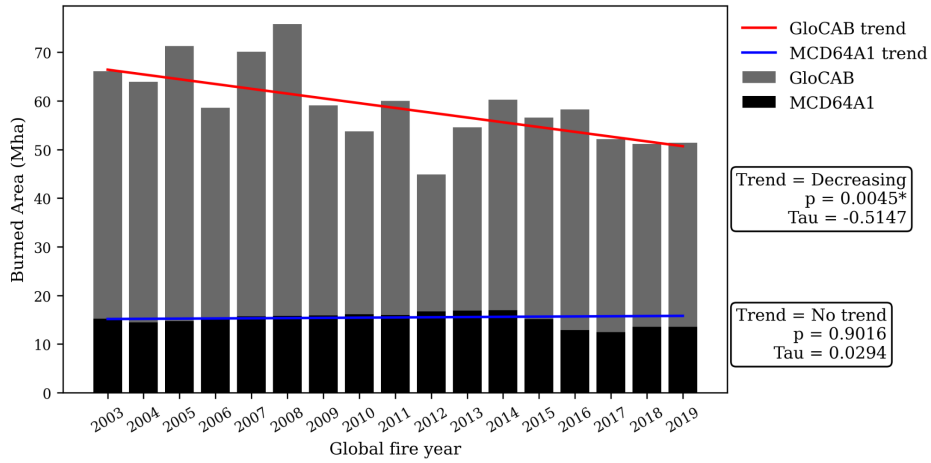

**Figure S2:** Global cropland burned area excluding Africa by global fire year (June – May) with Theil-Sen estimator trend lines with 95% confidence for this study (grey; red) and MCD64 (black; blue).
